# Supplementary material for: Hydrogen deuterium exchange mass spectrometry identifies the dominant paratope in CD20 antigen binding to the NCD1.2 monoclonal antibody
Source: Oxford University Press journal article supplement (doi:10.1042/bcj20200674), 2020-12-09
Supplement: bcj-2020-0674_supp.pdf [file bcj-2020-0674_supp.pdf]

## Supplementary Figure and Table legends

**Supplementary Figure 1. Comparison of the relative binding of the hybridoma derived NCD1.2 murine IgG and recombinant canine-murine chimeric IgG.** An ELISA with recombinant antibody expressed into the supernatant of HEK293 cells was used to define activity to the CD20 epitope peptide in relation to the NCD1.2 IgG. A titration in quadruplicate (with bars showing the error as a mean) of the light-chain-7/heavy chain antibody and murine NCD1.2. After adding the murine or canine IgG, either anti-mouse Fc HRP conjugated secondary antibody was added to the NCD1.2 reaction or anti-canine Fc HRP conjugated secondary antibody was added to the recombinant canine-murine chimeric antibody. The data are plotted as binding activity (in relative light units) a function of the amount of antibody titrated (in nanograms).

**Supplementary Figure 2.** Calculation of peptide antibody saturation. Fluorescence polarization of CD20 peptide (FAM)-NCDPANPSEK incubated with purified monoclonal antibody NCD1.2. Antibody concentration is reported as the molar concentration of immunoglobulin binding sites. The binding equilibrium and the dissociation constant between the antibody and the peptide were determined by fluorescence polarization using FAM labelled CD20 peptide as a tracer. The equilibrium dissociation constant ( $K_d$ ) was calculated by fitting the sigmoidal dose-dependent FP increases as a function of protein concentrations using Graphpad Prism. The following formulas were used to calculate the antibody saturation of the peptide in the HDX experiment. Saturation (S) is expressed as the ratio between the concentrations of peptide-bound antibody and total antibody concentration after addition of deuterated water. In the HDX experiment, after the addition of deuterium, the antibody concentration was 2 000 nM with ten times molar excess of peptide (20 000 nM). In this setup, the peptide occupancy of the antibody (S) was calculated to be 98.77%.

$$K_d = \frac{[A] \cdot [P]}{[AP]} ; [A] = A - [AP] ; [P] = P - [AP]$$

$$[AB] = \frac{A + P + K_d - \sqrt{A^2 + P^2 + K_d^2 + 2 \cdot A \cdot P + 2 \cdot A \cdot K_d + 2 \cdot P \cdot K_d - 4 \cdot A \cdot P}}{2}$$

$$S = \frac{[AP]}{A}$$

A - total antibody concentration  
P - total peptide concentration  
[AP] - concentration of antibody peptide complex  
[P] - concentration of unbound peptide  
[A] - concentration of unbound antibody  
K<sub>d</sub> - dissociation constant  
S - saturation of antibody with peptide

**Supplementary Figure 3. Interaction of the NCD1.2 monoclonal antibody with the CD20 peptide suppresses deuteration at specific CDRs.** Deuteration levels (exchanged deuterons, #D) of ligand-free NCD1.2 and in complex with the CD20 peptide in molar ratios of 1 : 1 or 1 : 10 (NCD1.2 : CD20), alternatively incubated in H<sub>2</sub>O buffer for 60 min at room temperature before the time course of deuteration (10 sec, 1 min, and 10 min). The reactions at antibody : peptide ratio of 1:1 were pre-incubated for 60 min at room temperature and the reactions at antibody : peptide ratio of 1:10 mixed and were immediately subjected to deuteration. Numbers at the left indicate the NCD1.2 peptide fragments belonging to light and heavy chains; schematic representation at the right shows NCD1.2 antibody CDR and FR regions. Dashed lines in the graphs indicate S.D. of the measurement (see Experimental procedures and Supplementary Table 1). The green and red lines represent data obtained from reactions at a 1 : 1 or a 1 : 10 (NCD1.2 : CD20) ratio with preincubation in H<sub>2</sub>O buffer for 60 min and the light brown line represents data obtained from reactions at a 1 : 10 (NCD1.2 : CD20) ratio without preincubation in H<sub>2</sub>O buffer for 60 min.

**Supplementary Table 1. Summary of NCD1.2 deuteration after interaction with the CD20 peptide at different molar ratios (NCD1.2 : CD20 peptide).** The table contains data exported from HDExaminer and Proteome Discoverer 1.4 programs. The start and end residues of the peptides with amino acid sequence of NCD1.2 peptides are listed in columns **A-C**. The time of deuteration and theoretical maximally exchanged deuterons in each peptide (maxD) are in columns **D** and **E**. Experimentally measured exchanged deuterons, their number (#D, column **F**) or percentage (%D, column **G**) with calculated S.D. from triplicates (column **H**). These values (#D, %D, and S.D.) are introduced for all states of NCD1.2 antibody (free and in complex with the CD20 peptide).

**Supplementary Table 2. HDX-MS summary results of the standard myoglobin protein.** The table contains data exported from HDExaminer. The start and end residues of the peptides with amino acid sequence of myoglobin peptides are listed in columns **A-C**. Time of deuteration was 30h for preparation of fully deuterated protein (column **D**). Columns **E-H** were described in Supplementary Table 1. Percentage of back exchange was calculated as 100 minus %D (column **F**).

**Supplementary Table 3. List of the raw files from mass spectrometry analysis submitted to ProteomeXchange Consortium via the PRIDE partner repository.** The raw files were deposited as two datasets.

**Supplementary Table 4. Summary of NCD1.2 mass spectrometry characterization and peptide deuteration after interaction with the CD20 peptide at a molar ratio of 1 : 10 (NCD1.2 : CD20 peptide).** The table contains data exported from HDExaminer and Proteome Discoverer 1.4 programs. The start and end residues of the peptides with amino acid sequence of the NCD1.2 peptides are listed in columns **A-C**. Mass spectrometry characterization of the peptides is performed by: high confidence threshold (Xcorr, column **D**), charge of peptide (column **E**), mass of single-charged peptic peptide MH<sup>+</sup> in Da (column **F**), and retention time

in min (column **G**). Time of deuteration (10 sec, 60 sec, 600 sec and MAX that was 24h for preparation of fully deuterated protein, column **H**). Columns **I-O** were described in Supplementary Table 1.

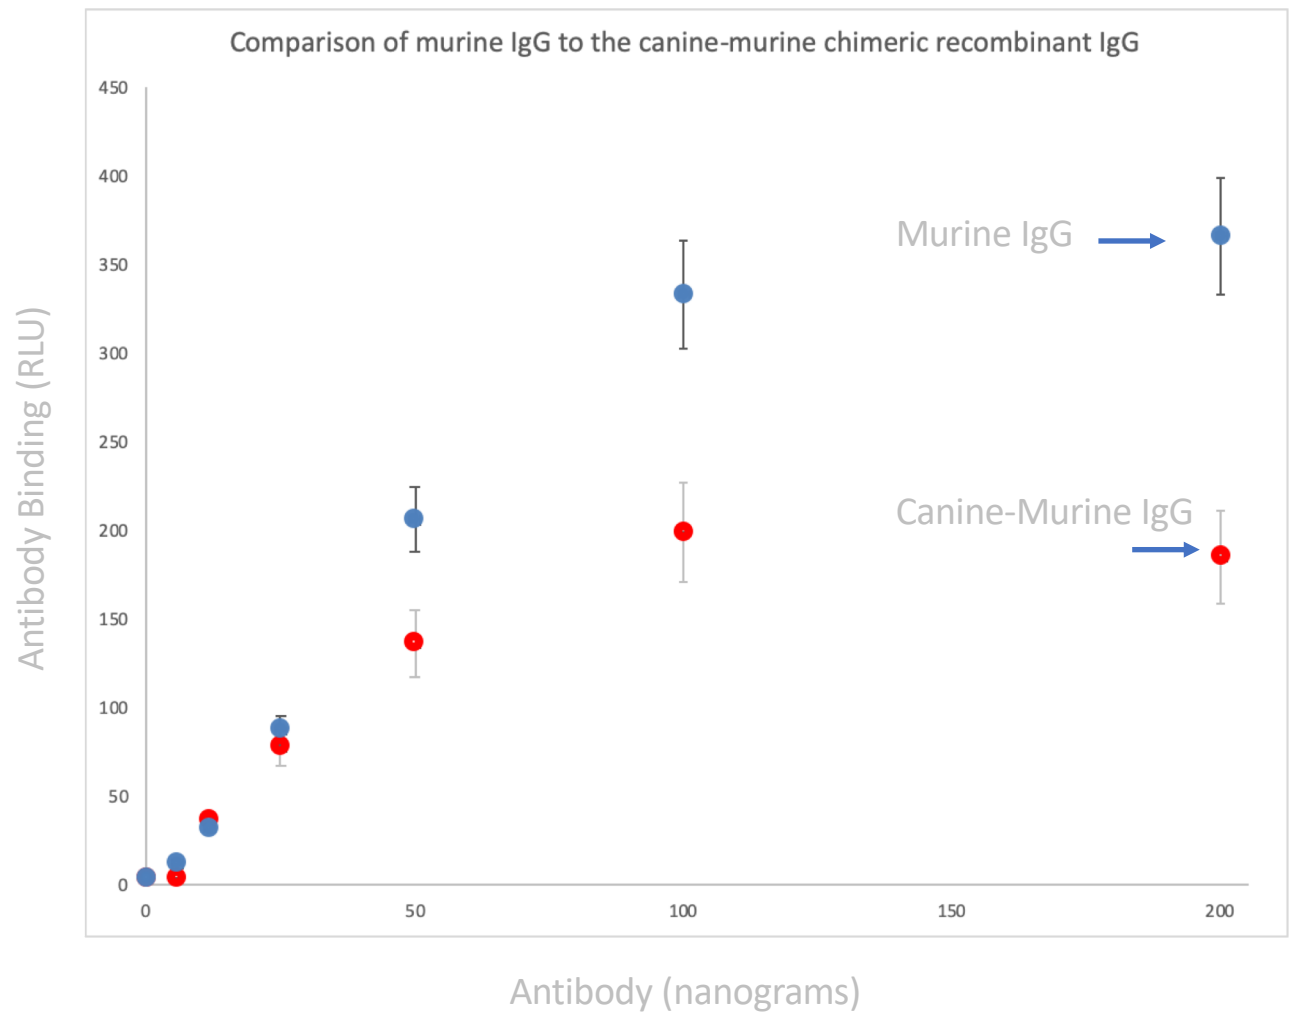

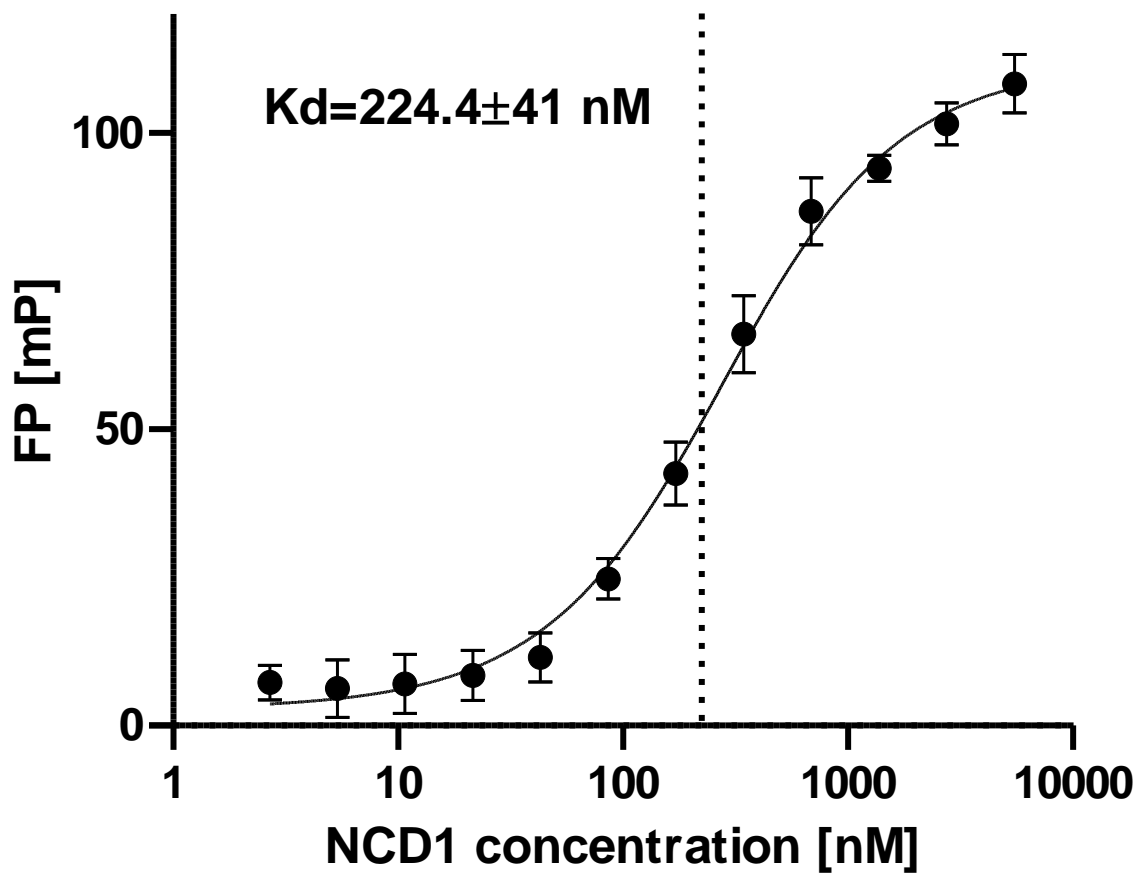

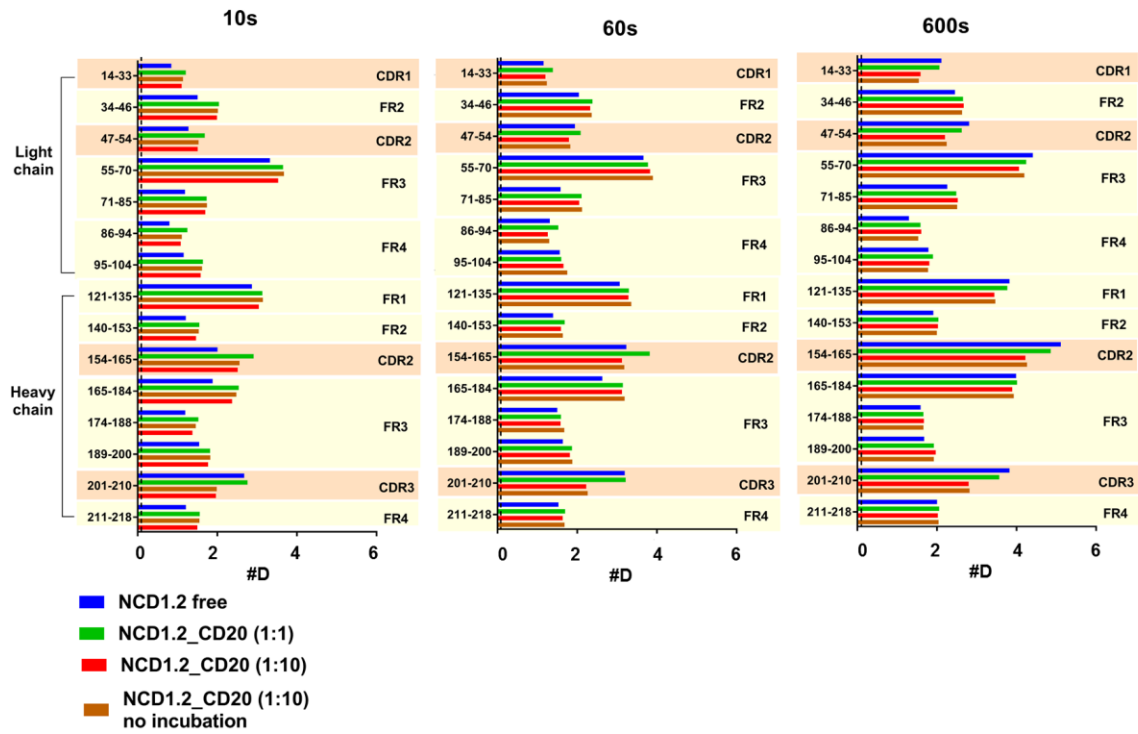

**1) The first dataset: MS data from mapping the antibody peptide fragments (PXD018510; Username: reviewer38806@ebi.ac.uk, Password: eOgipxVu)**

IDA\_120min\_TripleTOF\_NCD1\_Pepsin\_digestion

IDA\_120min\_TripleTOF\_NCD1\_Pepsin\_digestion\_\_FDR

IDA\_120min\_TripleTOF\_NCD1\_Pepsin\_digestion\_1

IDA\_120min\_TripleTOF\_NCD1\_Pepsin\_digestion\_1.wiff

IDA\_120min\_TripleTOF\_NCD1\_Pepsin\_digestion\_2

IDA\_120min\_TripleTOF\_NCD1\_Pepsin\_digestion\_2.wiff

IDA\_120min\_TripleTOF\_NCD1\_Pepsin\_digestion\_3

IDA\_120min\_TripleTOF\_NCD1\_Pepsin\_digestion\_3.wiff

IDA\_120min\_TripleTOF\_NCD1\_Pepsin\_digestion\_PeptideSummary

LC-MSMS\_NCD\_1.2\_In-sol\_digestion\_pepsin.msf

LC-MSMS\_NCD\_1.2\_In-sol\_digestion\_pepsin.raw

LC-MSMS\_NCD\_1.2\_In-sol\_digestion\_trypsin.msf

LC-MSMS\_NCD\_1.2\_In-sol\_digestion\_trypsin.raw

LC-MSMS\_NCD\_1.2\_In-sol\_digestion\_trypsin\_LysC.msf



LC-MSMS\_NCD\_1.2\_In-sol\_digestion\_trypsin\_LysC.raw

**(2) The second dataset: MS data from HDX-MS analysis (PXD018550; Username: reviewer76109@ebi.ac.uk, Password: liYmwPfe).**

HDX\_myoglobin\_MAP.msf

HDX\_myoglobin\_MAP.raw

HDX\_myoglobin\_ND\_replicate1.raw

HDX\_myoglobin\_ND\_replicate2.raw

HDX\_myoglobin\_ND\_replicate3.raw

HDX\_myoglobin\_replicate1.raw

HDX\_myoglobin\_replicate2.raw

HDX\_myoglobin\_replicate3.raw

HDX\_NCD\_1min\_replicate1.raw

HDX\_NCD\_1min\_replicate2.raw

HDX\_NCD\_1min\_replicate3.raw

HDX\_NCD\_10min\_replicate1.raw

HDX\_NCD\_10min\_replicate2.raw

HDX\_NCD\_10min\_replicate3.raw

HDX\_NCD\_10s\_replicate1.raw

HDX\_NCD\_10s\_replicate2.raw

HDX\_NCD\_10s\_replicate3.raw

HDX\_NCD\_FD\_replicate1.raw

HDX\_NCD\_FD\_replicate2.raw

HDX\_NCD\_FD\_replicate3.raw

HDX\_NCD\_MAP.msf

HDX\_NCD\_MAP.raw

HDX\_NCD\_ND\_replicate1.raw

HDX\_NCD\_ND\_replicate2.raw

HDX\_NCD\_ND\_replicate3.raw

HDX\_NCD\_peptide\_1\_1\_1min\_replicate1.raw

HDX\_NCD\_peptide\_1\_1\_1min\_replicate2.raw

HDX\_NCD\_peptide\_1\_1\_1min\_replicate3.raw

HDX\_NCD\_peptide\_1\_1\_10min\_replicate1.raw

HDX\_NCD\_peptide\_1\_1\_10min\_replicate2.raw

HDX\_NCD\_peptide\_1\_1\_10min\_replicate3.raw

HDX\_NCD\_peptide\_1\_1\_10s\_replicate1.raw

HDX\_NCD\_peptide\_1\_1\_10s\_replicate2.raw

HDX\_NCD\_peptide\_1\_1\_10s\_replicate3.raw

HDX\_NCD\_peptide\_1\_10\_1min\_replicate1.raw

HDX\_NCD\_peptide\_1\_10\_1min\_replicate2.raw

HDX\_NCD\_peptide\_1\_10\_1min\_replicate3.raw

HDX\_NCD\_peptide\_1\_10\_10min\_replicate1.raw

HDX\_NCD\_peptide\_1\_10\_10min\_replicate2.raw

HDX\_NCD\_peptide\_1\_10\_10min\_replicate3.raw

HDX\_NCD\_peptide\_1\_10\_10s\_replicate1.raw

HDX\_NCD\_peptide\_1\_10\_10s\_replicate2.raw

HDX\_NCD\_peptide\_1\_10\_10s\_replicate3.raw

HDX\_NCD\_peptide\_1\_10\_no\_preincubation\_10min\_replicate1.raw

HDX\_NCD\_peptide\_1\_10\_no\_preincubation\_10min\_replicate2.raw

HDX\_NCD\_peptide\_1\_10\_no\_preincubation\_10min\_replicate3.raw

HDX\_NCD\_peptide\_1\_10\_no\_preincubation\_1min\_replicate1.raw

HDX\_NCD\_peptide\_1\_10\_no\_preincubation\_1min\_replicate2.raw

HDX\_NCD\_peptide\_1\_10\_no\_preincubation\_1min\_replicate3.raw

HDX\_NCD\_peptide\_1\_10\_no\_preincubation\_10s\_replicate1.raw

HDX\_NCD\_peptide\_1\_10\_no\_preincubation\_10s\_replicate2.raw

HDX\_NCD\_peptide\_1\_10\_no\_preincubation\_10s\_replicate3.raw
